# Supplementary material for: Gene isoforms as expression-based biomarkers predictive of drug response in vitro
Source: PubMed Central journal article supplement (PMC5655668; doi:10.1038/s41467-017-01153-8), 2017-10-24
Supplement: 41467_2017_1153_MOESM3_ESM.pdf [file 41467_2017_1153_MOESM3_ESM.pdf]

## **Description of Supplementary Files**

File name: Supplementary Data 1

Description: List of significant associations identified in the training sets.

File name: Supplementary Data 2

Description: List of validated pan-cancer biomarkers in gCSI.

File name: Supplementary Data 3

Description: List of pre-validated breast biomarkers in GRAY.

File name: Supplementary Data 4

Description: List of validated breast biomarkers in UHN.

File name: Supplementary Data 5

Description: List of drugs in GDSC, CCLE, gCSI, GRAY and UHN.

File name: Supplementary Data 6

Description: List of cell lines screened in GDSC, CCLE, gCSI, GRAY and UHN.
